# Supplementary material
Source: ML conference proceedings conference paper supplement (https://proceedings.mlr.press/v222/yazdani24a.html)
Supplement: Supplementary file [file yazdani24a-supp.pdf]

# Supplementary Materials for DENL: Diverse Ensemble and Noisy Logits for Improved Robustness of Neural Networks

**Mina Yazdani**

**Hamed Karimi**

**Reza Samavi**

*Department of Electrical, Computer, and Biomedical Engineering,  
Toronto Metropolitan University, Toronto, ON, Canada  
Vector Institute, Toronto, ON, Canada*

MINA.YAZDANI@TORONTOMU.CA

HAMED.KARIMI@TORONTOMU.CA

SAMAVI@TORONTOMU.CA

**Editors:** Berrin Yanıkoğlu and Wray Buntine

## Appendix A. Fine-tuning $\lambda$ Parameter

The result of fine-tuning the  $\lambda$  parameter on SAE ensemble for CIFAR10 and MNIST, are reported in Table 1. As we can see,  $\lambda = 0.4$  results in the ensemble with the highest accuracy on the adversarial examples generated by single attack scenario. The adversarial example classification and the average perturbations implemented on adversarial examples for CIFAR10 after Phase 2 are shown in Tables 6 and 7, respectively. The adversarial examples classification and the average perturbations implemented on adversarial examples for MNIST after Phase 2 are shown in Tables 8 and 9, respectively.

## Appendix B. Adversarial Examples Classification and Perturbation Details

The adversarial examples classification results for CIFAR10 are shown in Tables 2(a) and 3(a), for adversarial examples of single attack and superimposition attack, respectively. Tables 4(a) and 5(a) show the adversarial examples classification on the MNIST for single and superimposition attack, respectively. The information of the tables are categorized in three sections of correctly classified (when the predicted class of these images remains unchanged after attack), classified to target (when the predicted label is the target label of the attack) and classified to others (when the predicted label is not correct and is not the target label of the attack). Tables 2(b) and 3(b) show the average perturbation on adversarial examples generated on CIFAR10 for single attack and superimposition attack, respectively. Tables 4(b) and 5(b) show the average perturbation on adversarial examples generated on MNIST for single attack and superimposition attack, respectively.

Table 1: Fine-tuning the  $\lambda$  parameter on SAE ensemble for CIFAER10 and MNIST

| $\lambda$ | Adversarial Accuracy |                   |
|-----------|----------------------|-------------------|
|           | CIFAR10              | MNIST             |
| 0.1       | 94.85 $\pm$ 0.59%    | 89.40 $\pm$ 0.21% |
| 0.2       | 95.12 $\pm$ 0.35%    | 89.83 $\pm$ 0.45% |
| 0.3       | 95.76 $\pm$ 0.21%    | 90.11 $\pm$ 0.72% |
| 0.4       | 96.01 $\pm$ 0.27%    | 90.39 $\pm$ 0.81% |
| 0.5       | 95.34 $\pm$ 0.32%    | 90.05 $\pm$ 0.23% |
| 0.6       | 95.36 $\pm$ 0.69%    | 89.66 $\pm$ 0.35% |
| 0.7       | 94.48 $\pm$ 0.37%    | 89.34 $\pm$ 0.29% |

Table 2: Single attack statistics on CIFAR10 dataset over 5 folds

|                    | (a) Adversarial Examples Classification (%) |                      |                     | (b) Average Adversarial Perturbation (%) |                      |                     |
|--------------------|---------------------------------------------|----------------------|---------------------|------------------------------------------|----------------------|---------------------|
|                    | Correctly Classified                        | Classified to Target | Classified to Other | Correctly Classified                     | Classified to Target | Classified to Other |
| Individual Model   | 0.00 $\pm$ 0.00                             | 100.00 $\pm$ 0.00    | 0.00 $\pm$ 0.00     | 0.00 $\pm$ 0.00                          | 2.28 $\pm$ 0.12      | 0.00 $\pm$ 0.00     |
| SAE                | 94.48 $\pm$ 0.05                            | 1.26 $\pm$ 0.36      | 4.25 $\pm$ 0.41     | 3.13 $\pm$ 0.18                          | 1.58 $\pm$ 0.06      | 3.44 $\pm$ 0.31     |
| SAE + Noisy Logits | 96.06 $\pm$ 0.24                            | 0.44 $\pm$ 0.49      | 3.49 $\pm$ 0.26     | 3.01 $\pm$ 0.38                          | 1.05 $\pm$ 0.12      | 3.24 $\pm$ 0.21     |
| DAE                | 95.11 $\pm$ 0.23                            | 1.15 $\pm$ 0.05      | 3.74 $\pm$ 0.44     | 2.90 $\pm$ 0.22                          | 1.62 $\pm$ 0.03      | 3.24 $\pm$ 0.08     |
| DAE + Noisy Logits | 96.32 $\pm$ 0.26                            | 0.24 $\pm$ 0.19      | 3.45 $\pm$ 0.17     | 2.74 $\pm$ 0.04                          | 1.18 $\pm$ 0.27      | 3.16 $\pm$ 0.19     |

### Appendix C. Experiments Recorded Time

We ran more than 450 groups of experiments to evaluate our method. We show the time required for running one sample experiment on MNIST for SAE and DAE ensemble in Table 10 which shows that the time needed for experiments in DAE ensemble is not noticeably higher than SAE in this experiment.

Table 3: Superimposition attack statistics on CIFAR10 dataset over 5 folds

|                    | (a) Adversarial Examples Classification (%) |                      |                     | (b) Average Adversarial Perturbation (%) |                      |                     |
|--------------------|---------------------------------------------|----------------------|---------------------|------------------------------------------|----------------------|---------------------|
|                    | Correctly Classified                        | Classified to Target | Classified to Other | Correctly Classified                     | Classified to Target | Classified to Other |
| SAE                | 91.81 $\pm$ 0.17                            | 0.09 $\pm$ 0.04      | 8.09 $\pm$ 0.96     | 3.31 $\pm$ 0.06                          | 1.92 $\pm$ 0.84      | 3.76 $\pm$ 0.21     |
| SAE + Noisy Logits | 94.65 $\pm$ 0.21                            | 0.21 $\pm$ 0.11      | 5.14 $\pm$ 0.41     | 3.09 $\pm$ 0.08                          | 0.12 $\pm$ 0.13      | 3.57 $\pm$ 0.40     |
| DAE                | 95.34 $\pm$ 0.19                            | 0.07 $\pm$ 0.04      | 4.58 $\pm$ 0.07     | 2.23 $\pm$ 0.02                          | 1.45 $\pm$ 0.08      | 2.38 $\pm$ 0.11     |
| DAE + Noisy Logits | 96.47 $\pm$ 0.34                            | 0.27 $\pm$ 0.05      | 3.26 $\pm$ 0.05     | 2.45 $\pm$ 0.03                          | 0.09 $\pm$ 0.11      | 2.43 $\pm$ 0.03     |

Table 4: Single attack statistics on MNIST dataset over 5 folds

|                    | (a) Adversarial Examples Classification (%) |                      |                     | (b) Average Adversarial Perturbation (%) |                      |                     |
|--------------------|---------------------------------------------|----------------------|---------------------|------------------------------------------|----------------------|---------------------|
|                    | Correctly Classified                        | Classified to Target | Classified to Other | Correctly Classified                     | Classified to Target | Classified to Other |
| Individual Model   | 0.00 $\pm$ 0.00                             | 100.00 $\pm$ 0.00    | 0.00 $\pm$ 0.00     | 0.00 $\pm$ 0.00                          | 14.46 $\pm$ 1.05     | 0.00 $\pm$ 0.00     |
| SAE                | 89.40 $\pm$ 0.34                            | 3.76 $\pm$ 0.06      | 6.83 $\pm$ 0.29     | 16.26 $\pm$ 0.35                         | 14.80 $\pm$ 0.32     | 19.62 $\pm$ 0.34    |
| SAE + noisy logits | 80.59 $\pm$ 0.12                            | 5.11 $\pm$ 0.22      | 14.30 $\pm$ 0.81    | 14.33 $\pm$ 0.11                         | 15.90 $\pm$ 0.57     | 18.70 $\pm$ 0.30    |
| DAE                | 90.98 $\pm$ 0.07                            | 2.88 $\pm$ 0.14      | 6.14 $\pm$ 0.32     | 16.17 $\pm$ 0.36                         | 14.80 $\pm$ 0.58     | 19.69 $\pm$ 0.33    |
| DAE + noisy logits | 81.69 $\pm$ 0.05                            | 4.89 $\pm$ 0.03      | 13.41 $\pm$ 0.79    | 14.17 $\pm$ 0.24                         | 16.25 $\pm$ 0.54     | 18.72 $\pm$ 0.41    |

Table 5: Superimposition attack statistics on MNIST dataset over 5 folds

|                    | (a) Adversarial Examples Classification (%) |                      |                     | (b) Average Adversarial Perturbation (%) |                      |                     |
|--------------------|---------------------------------------------|----------------------|---------------------|------------------------------------------|----------------------|---------------------|
|                    | Correctly Classified                        | Classified to Target | Classified to Other | Correctly Classified                     | Classified to Target | Classified to Other |
| SAE                | 31.82 $\pm$ 0.14                            | 45.76 $\pm$ 0.88     | 22.41 $\pm$ 0.29    | 16.28 $\pm$ 0.35                         | 24.52 $\pm$ 0.58     | 27.67 $\pm$ 0.28    |
| SAE + noisy logits | 82.07 $\pm$ 0.02                            | 2.68 $\pm$ 0.71      | 15.24 $\pm$ 0.22    | 12.38 $\pm$ 0.47                         | 16.19 $\pm$ 0.73     | 18.36 $\pm$ 0.37    |
| DAE                | 33.69 $\pm$ 1.18                            | 43.59 $\pm$ 1.02     | 22.73 $\pm$ 0.48    | 16.45 $\pm$ 0.41                         | 24.74 $\pm$ 0.80     | 27.83 $\pm$ 0.35    |
| DAE + noisy logits | 84.02 $\pm$ 0.96                            | 1.86 $\pm$ 0.52      | 14.13 $\pm$ 0.65    | 12.08 $\pm$ 0.36                         | 18.11 $\pm$ 1.06     | 18.85 $\pm$ 0.49    |

Table 6: Single attack statistics on CIFAR10 dataset

|                    | (a) Adversarial Examples Classification (%) |                      |                     | (b) Average Adversarial Perturbation (%) |                      |                     |
|--------------------|---------------------------------------------|----------------------|---------------------|------------------------------------------|----------------------|---------------------|
|                    | Correctly Classified                        | Classified to Target | Classified to Other | Correctly Classified                     | Classified to Target | Classified to Other |
| SAE                | 96.01 $\pm$ 0.27                            | 1.11 $\pm$ 0.07      | 2.88 $\pm$ 0.02     | 3.14 $\pm$ 0.15                          | 1.58 $\pm$ 0.06      | 3.45 $\pm$ 0.03     |
| SAE + noisy logits | 97.21 $\pm$ 0.13                            | 0.51 $\pm$ 0.14      | 2.29 $\pm$ 0.19     | 2.68 $\pm$ 0.32                          | 1.20 $\pm$ 0.27      | 2.62 $\pm$ 0.31     |
| DAE                | 96.82 $\pm$ 0.28                            | 1.01 $\pm$ 0.04      | 2.17 $\pm$ 0.07     | 2.87 $\pm$ 0.26                          | 1.53 $\pm$ 0.18      | 2.78 $\pm$ 0.13     |
| DAE + noisy logits | 98.29 $\pm$ 0.61                            | 0.41 $\pm$ 0.03      | 1.30 $\pm$ 0.16     | 2.41 $\pm$ 0.27                          | 1.02 $\pm$ 0.26      | 2.26 $\pm$ 0.24     |

Table 7: Superimposition attack statistics on CIFAR10 dataset

|                    | (a) Adversarial Examples Classification(%) |                      |                     | (b) Average Adversarial Perturbation(%) |                      |                     |
|--------------------|--------------------------------------------|----------------------|---------------------|-----------------------------------------|----------------------|---------------------|
|                    | Correctly Classified                       | Classified to Target | Classified to Other | Correctly Classified                    | Classified to Target | Classified to Other |
| SAE                | 92.97 $\pm$ 0.21                           | 0.62 $\pm$ 0.08      | 6.41 $\pm$ 0.06     | 2.25 $\pm$ 0.14                         | 0.88 $\pm$ 0.06      | 2.24 $\pm$ 0.28     |
| SAE + noisy logits | 96.11 $\pm$ 0.05                           | 0.30 $\pm$ 0.03      | 3.59 $\pm$ 0.04     | 2.09 $\pm$ 0.17                         | 0.19 $\pm$ 0.04      | 1.94 $\pm$ 0.39     |
| DAE                | 96.90 $\pm$ 0.74                           | 0.04 $\pm$ 0.02      | 3.06 $\pm$ 0.08     | 2.59 $\pm$ 0.24                         | 1.46 $\pm$ 0.12      | 2.61 $\pm$ 0.48     |
| DAE + noisy logits | 97.46 $\pm$ 0.41                           | 0.17 $\pm$ 0.02      | 2.37 $\pm$ 0.15     | 2.41 $\pm$ 0.30                         | 0.20 $\pm$ 0.02      | 0.21 $\pm$ 0.09     |

Table 8: Single attack statistics on MNIST dataset

|                    | (a) Adversarial Examples Classification(%) |                      |                     | (b) Average Adversarial Perturbation(%) |                      |                     |
|--------------------|--------------------------------------------|----------------------|---------------------|-----------------------------------------|----------------------|---------------------|
|                    | Correctly Classified                       | Classified to Target | Classified to Other | Correctly Classified                    | Classified to Target | Classified to Other |
| SAE                | 90.39 $\pm$ 0.81                           | 1.70 $\pm$ 0.06      | 7.92 $\pm$ 0.02     | 16.97 $\pm$ 0.41                        | 22.70 $\pm$ 0.33     | 27.14 $\pm$ 0.26    |
| SAE + noisy logits | 82.61 $\pm$ 0.95                           | 1.40 $\pm$ 0.04      | 15.98 $\pm$ 0.76    | 11.70 $\pm$ 0.46                        | 11.62 $\pm$ 0.27     | 16.33 $\pm$ 0.13    |
| DAE                | 91.50 $\pm$ 0.87                           | 1.59 $\pm$ 0.08      | 6.90 $\pm$ 0.04     | 15.87 $\pm$ 0.55                        | 13.63 $\pm$ 0.51     | 20.90 $\pm$ 0.33    |
| DAE + noisy logits | 83.02 $\pm$ 0.94                           | 1.01 $\pm$ 0.03      | 15.97 $\pm$ 0.73    | 11.92 $\pm$ 0.38                        | 11.40 $\pm$ 0.35     | 16.55 $\pm$ 0.61    |

Table 9: Superimposition attack statistics on MNIST dataset

|                    | (a) Adversarial Examples Classification(%) |                      |                     | (b) Average Adversarial Perturbation(%) |                      |                     |
|--------------------|--------------------------------------------|----------------------|---------------------|-----------------------------------------|----------------------|---------------------|
|                    | Correctly Classified                       | Classified to Target | Classified to Other | Correctly Classified                    | Classified to Target | Classified to Other |
| SAE                | 32.55 ± 0.45                               | 33.80 ± 0.59         | 33.64 ± 0.45        | 15.71 ± 0.78                            | 13.37 ± 0.51         | 27.46 ± 0.44        |
| SAE + noisy logits | 83.94 ± 0.17                               | 1.43 ± 0.07          | 14.64 ± 0.48        | 11.07 ± 0.53                            | 14.45 ± 0.08         | 17.57 ± 0.92        |
| DAE                | 34.10 ± 0.91                               | 29.92 ± 0.82         | 35.98 ± 0.54        | 17.42 ± 0.50                            | 21.18 ± 0.71         | 25.77 ± 1.01        |
| DAE + noisy logits | 86.65 ± 1.61                               | 1.24 ± 0.14          | 12.10 ± 0.39        | 11.99 ± 0.35                            | 10.82 ± 0.82         | 16.55 ± 0.77        |

Table 10: Experiment run time on MNIST for SAE and DAE ensemble

|                                                          | SAE         | DAE         |
|----------------------------------------------------------|-------------|-------------|
| Phase 1 Training                                         | 8924.28 Sec | 9120.11 Sec |
| Phase 2 Training                                         | 7673.36 Sec | 6980.38 Sec |
| Generating Adversarial Examples (Single Attack)          | 7751.63 Sec | 8929.26 Sec |
| Generating Adversarial Examples (Superimposition Attack) | 8070.10 Sec | 7035.88 Sec |
